# Supplementary material for: Antitumor component recognition from the Aconiti Lateralis Radix Praeparata and Glycyrrhizae Radix et Rhizoma herb pair extract by chemometrics and mean impact value
Source: Royal Society of Chemistry journal article supplement (doi:10.1039/c8ra07911k), 2018-01-01
Supplement: c8ra07911k1.pdf [file c8ra07911k1.pdf]

1 Supplemental material:

2 **Table S1** The relative peak areas of 30 characteristic peaks in 31 batches of Fuzi- Gancao extract

| Peak | Sample |       |       |       |       |       |       |       |       |       |       |       |       |       |       |       |
|------|--------|-------|-------|-------|-------|-------|-------|-------|-------|-------|-------|-------|-------|-------|-------|-------|
|      | 1      | 2     | 3     | 4     | 5     | 6     | 7     | 8     | 9     | 10    | 11    | 12    | 13    | 14    | 15    | 16    |
| 1    | 0.435  | 0.234 | 0.197 | 0.242 | 0.220 | 0.168 | 0.286 | 0.173 | 0.146 | 0.351 | 0.195 | 0.415 | 0.206 | 0.325 | 0.245 | 0.233 |
| 2    | 0.201  | 0.197 | 0.204 | 0.523 | 0.542 | 0.189 | 0.179 | 0.146 | 0.450 | 0.210 | 0.477 | 0.188 | 0.189 | 0.186 | 0.203 | 0.199 |
| 3    | 0.614  | 0.636 | 0.693 | 0.202 | 0.192 | 0.604 | 0.839 | 0.473 | 0.185 | 0.678 | 0.158 | 0.147 | 0.569 | 1.488 | 0.579 | 0.526 |
| 4    | 0.656  | 0.545 | 0.251 | 0.857 | 0.549 | 0.575 | 0.545 | 0.428 | 0.605 | 0.403 | 0.613 | 0.750 | 0.573 | 0.503 | 0.684 | 0.478 |
| 5    | 0.389  | 0.442 | 0.352 | 0.414 | 0.200 | 0.178 | 0.435 | 0.197 | 0.448 | 0.365 | 0.403 | 0.439 | 0.341 | 0.572 | 0.344 | 0.433 |
| 6    | 0.288  | 0.342 | 0.328 | 0.281 | 0.359 | 0.310 | 0.288 | 0.301 | 0.236 | 0.226 | 0.178 | 0.426 | 0.216 | 0.746 | 0.244 | 0.285 |
| 7    | 0.405  | 0.313 | 0.358 | 0.358 | 0.383 | 0.296 | 0.413 | 0.240 | 0.298 | 0.308 | 0.272 | 0.346 | 0.276 | 0.584 | 0.309 | 0.338 |
| 8    | 0.516  | 0.442 | 0.640 | 0.413 | 0.475 | 0.204 | 0.329 | 0.206 | 0.233 | 0.366 | 0.377 | 0.559 | 0.470 | 2.095 | 0.456 | 0.408 |
| 9    | 0.192  | 0.268 | 0.142 | 0.152 | 0.145 | 0.165 | 0.178 | 0.149 | 0.150 | 0.168 | 0.261 | 0.185 | 0.161 | 0.200 | 0.197 | 0.148 |
| 10   | 0.351  | 0.260 | 0.141 | 0.449 | 0.308 | 0.263 | 0.336 | 0.177 | 0.313 | 0.233 | 0.199 | 0.277 | 0.306 | 0.359 | 0.367 | 0.327 |
| 11   | 0.576  | 0.574 | 0.249 | 0.246 | 0.688 | 0.588 | 0.562 | 0.670 | 0.560 | 0.422 | 0.341 | 0.813 | 0.505 | 0.612 | 0.731 | 0.588 |
| 12   | 0.478  | 0.274 | 0.274 | 0.421 | 0.388 | 0.470 | 0.435 | 0.247 | 0.367 | 0.323 | 0.155 | 0.448 | 0.343 | 0.401 | 0.459 | 0.366 |
| 13   | 0.681  | 0.646 | 0.537 | 1.105 | 0.425 | 0.687 | 0.659 | 0.156 | 0.485 | 0.398 | 0.406 | 0.597 | 0.467 | 0.280 | 0.565 | 0.470 |
| 14   | 0.743  | 0.659 | 0.692 | 3.976 | 0.721 | 1.108 | 0.747 | 0.141 | 0.723 | 0.547 | 0.307 | 0.862 | 0.692 | 0.486 | 0.686 | 0.657 |
| 15   | 0.333  | 0.304 | 0.203 | 0.362 | 0.276 | 3.019 | 0.319 | 0.668 | 0.347 | 0.337 | 2.809 | 2.651 | 0.406 | 0.288 | 0.369 | 0.327 |

3

4 **Table S1** (*continue*)

| Peak | Sample |       |       |       |       |       |       |       |       |       |       |       |       |       |       |       |
|------|--------|-------|-------|-------|-------|-------|-------|-------|-------|-------|-------|-------|-------|-------|-------|-------|
|      | 1      | 2     | 3     | 4     | 5     | 6     | 7     | 8     | 9     | 10    | 11    | 12    | 13    | 14    | 15    | 16    |
| 16   | 2.501  | 2.161 | 1.932 | 5.290 | 2.212 | 0.177 | 2.804 | 2.533 | 1.985 | 1.971 | 2.756 | 3.511 | 2.216 | 0.679 | 2.612 | 1.843 |
| 17   | 1.713  | 1.727 | 1.874 | 1.201 | 2.326 | 1.912 | 2.670 | 4.318 | 2.243 | 1.983 | 0.170 | 0.152 | 2.274 | 1.898 | 2.539 | 1.895 |
| 18   | 0.207  | 0.211 | 0.201 | 0.157 | 0.205 | 0.238 | 0.184 | 0.183 | 0.227 | 0.319 | 0.171 | 0.445 | 0.171 | 0.333 | 0.179 | 0.204 |
| 19   | 0.527  | 0.479 | 0.418 | 1.221 | 0.416 | 0.677 | 0.564 | 0.489 | 0.455 | 0.412 | 0.527 | 0.683 | 0.464 | 0.377 | 0.499 | 0.394 |
| 20   | 0.335  | 0.354 | 0.312 | 1.569 | 0.273 | 0.412 | 0.393 | 0.400 | 0.395 | 0.338 | 0.333 | 0.349 | 0.363 | 0.284 | 0.332 | 0.312 |
| 21   | 0.244  | 0.239 | 0.200 | 1.111 | 0.219 | 0.299 | 0.286 | 0.213 | 0.254 | 0.242 | 0.285 | 0.393 | 0.253 | 0.270 | 0.235 | 0.232 |
| 22   | 0.456  | 0.491 | 0.370 | 1.043 | 0.176 | 0.438 | 0.697 | 0.786 | 0.596 | 0.527 | 0.687 | 0.632 | 0.607 | 0.362 | 0.660 | 0.521 |
| 23   | 1.807  | 2.261 | 1.549 | 3.044 | 1.301 | 1.740 | 2.368 | 1.056 | 2.908 | 2.330 | 1.532 | 1.648 | 3.006 | 1.162 | 1.812 | 2.421 |
| 24   | 0.339  | 0.438 | 0.336 | 0.533 | 0.657 | 0.303 | 0.487 | 0.263 | 0.527 | 0.331 | 0.503 | 0.274 | 0.449 | 0.474 | 0.492 | 0.444 |
| 25   | 0.323  | 0.195 | 0.270 | 0.294 | 0.277 | 0.194 | 0.228 | 0.414 | 0.220 | 0.391 | 0.203 | 0.354 | 0.206 | 0.183 | 0.235 | 0.191 |
| 26   | 0.698  | 1.300 | 0.519 | 0.617 | 1.755 | 1.020 | 1.484 | 1.115 | 1.404 | 0.809 | 1.345 | 1.445 | 1.298 | 0.417 | 1.389 | 1.186 |
| 27   | 0.773  | 0.906 | 0.889 | 1.723 | 1.417 | 1.429 | 1.158 | 1.283 | 1.182 | 0.211 | 1.532 | 1.463 | 1.165 | 0.946 | 1.195 | 1.071 |
| 28   | 0.425  | 0.432 | 0.389 | 0.782 | 0.714 | 0.479 | 0.551 | 0.172 | 0.601 | 0.456 | 0.589 | 0.288 | 0.647 | 0.301 | 0.554 | 0.519 |
| 29   | 4.060  | 5.181 | 4.551 | 4.364 | 6.935 | 6.356 | 7.911 | 7.133 | 6.470 | 5.925 | 9.012 | 7.457 | 6.448 | 4.212 | 7.077 | 5.735 |
| 30   | 0.730  | 0.970 | 0.857 | 0.705 | 1.219 | 1.236 | 1.414 | 0.605 | 1.174 | 1.021 | 1.502 | 0.736 | 1.108 | 0.833 | 1.151 | 0.992 |

5

6 **Table S1** (*continue*)

| Peak | Sample |       |       |       |       |       |       |       |       |       |       |       |       |       |       |
|------|--------|-------|-------|-------|-------|-------|-------|-------|-------|-------|-------|-------|-------|-------|-------|
|      | 17     | 18    | 19    | 20    | 21    | 22    | 23    | 24    | 25    | 26    | 27    | 28    | 29    | 30    | 31    |
| 1    | 0.189  | 0.198 | 0.277 | 0.341 | 0.399 | 0.204 | 0.337 | 0.323 | 0.204 | 0.235 | 0.282 | 0.149 | 0.259 | 0.146 | 0.415 |
| 2    | 0.202  | 0.229 | 0.230 | 0.187 | 0.176 | 0.160 | 0.167 | 0.180 | 0.139 | 0.233 | 0.139 | 0.150 | 0.156 | 0.154 | 0.156 |
| 3    | 0.503  | 0.698 | 0.632 | 0.569 | 0.235 | 0.432 | 0.699 | 0.597 | 0.755 | 0.509 | 0.631 | 0.517 | 0.682 | 0.563 | 0.582 |
| 4    | 0.666  | 0.738 | 0.976 | 0.778 | 0.750 | 0.739 | 0.644 | 0.585 | 0.583 | 0.500 | 0.621 | 0.544 | 0.526 | 0.512 | 0.524 |
| 5    | 0.357  | 0.425 | 0.429 | 0.231 | 0.326 | 0.254 | 0.322 | 0.290 | 0.343 | 0.320 | 0.360 | 0.307 | 0.325 | 0.345 | 0.351 |
| 6    | 0.221  | 0.283 | 0.332 | 0.231 | 0.299 | 0.358 | 0.283 | 0.263 | 0.215 | 0.206 | 0.235 | 0.199 | 0.294 | 0.191 | 0.208 |
| 7    | 0.263  | 0.338 | 0.353 | 0.322 | 0.296 | 0.234 | 0.359 | 0.309 | 0.415 | 0.380 | 0.454 | 0.311 | 0.464 | 0.374 | 0.394 |
| 8    | 0.358  | 0.422 | 0.489 | 0.384 | 0.515 | 0.372 | 0.425 | 0.362 | 0.171 | 0.146 | 0.198 | 0.167 | 0.484 | 0.175 | 0.189 |
| 9    | 0.248  | 0.201 | 0.181 | 0.176 | 0.177 | 0.133 | 0.136 | 0.150 | 0.210 | 0.135 | 0.234 | 0.155 | 0.184 | 0.196 | 0.161 |
| 10   | 0.277  | 0.311 | 0.247 | 0.148 | 0.388 | 0.185 | 0.269 | 0.235 | 0.315 | 0.232 | 0.360 | 0.391 | 0.252 | 0.181 | 0.271 |
| 11   | 0.688  | 0.342 | 0.408 | 0.235 | 0.463 | 0.782 | 0.448 | 0.323 | 0.564 | 0.501 | 0.362 | 0.434 | 0.475 | 0.610 | 0.506 |
| 12   | 0.434  | 0.361 | 0.426 | 0.274 | 0.386 | 0.440 | 0.314 | 0.385 | 0.400 | 0.312 | 0.309 | 0.383 | 0.273 | 0.257 | 0.377 |
| 13   | 0.374  | 0.675 | 1.004 | 0.618 | 0.535 | 0.182 | 0.407 | 0.547 | 0.465 | 0.515 | 0.416 | 0.564 | 0.514 | 0.574 | 0.627 |
| 14   | 0.501  | 0.594 | 1.789 | 1.201 | 1.018 | 0.181 | 0.890 | 0.991 | 0.763 | 0.904 | 0.536 | 0.482 | 0.690 | 0.554 | 0.717 |
| 15   | 0.317  | 0.363 | 0.190 | 0.136 | 0.183 | 4.626 | 2.228 | 0.203 | 0.254 | 0.149 | 0.241 | 0.216 | 0.243 | 0.236 | 0.258 |

7

8 **Table S1** (*continue*)

| Peak | Sample |       |        |        |       |        |       |       |       |       |       |       |       |       |       |
|------|--------|-------|--------|--------|-------|--------|-------|-------|-------|-------|-------|-------|-------|-------|-------|
|      | 17     | 18    | 19     | 20     | 21    | 22     | 23    | 24    | 25    | 26    | 27    | 28    | 29    | 30    | 31    |
| 16   | 1.865  | 3.317 | 4.995  | 5.025  | 2.688 | 7.424  | 2.418 | 3.472 | 2.485 | 2.564 | 1.566 | 1.971 | 2.604 | 1.975 | 2.833 |
| 17   | 2.020  | 1.692 | 1.439  | 1.466  | 2.466 | 0.145  | 0.133 | 1.503 | 3.420 | 2.300 | 1.716 | 1.903 | 2.074 | 1.727 | 2.686 |
| 18   | 0.197  | 0.206 | 0.222  | 0.210  | 0.209 | 0.426  | 0.422 | 0.429 | 0.415 | 0.420 | 0.316 | 0.166 | 0.160 | 0.192 | 0.157 |
| 19   | 0.397  | 0.645 | 1.075  | 0.825  | 0.590 | 1.041  | 0.483 | 0.684 | 0.528 | 0.556 | 0.253 | 0.331 | 0.492 | 0.417 | 0.624 |
| 20   | 0.292  | 0.309 | 0.598  | 0.305  | 0.367 | 0.101  | 0.365 | 0.329 | 0.274 | 0.409 | 0.253 | 0.139 | 0.307 | 0.345 | 0.362 |
| 21   | 0.219  | 0.210 | 0.510  | 0.213  | 0.172 | 0.749  | 0.485 | 0.225 | 0.188 | 0.176 | 0.137 | 0.385 | 0.225 | 0.210 | 0.279 |
| 22   | 0.501  | 0.548 | 0.671  | 0.310  | 0.526 | 0.098  | 0.494 | 0.332 | 0.697 | 0.469 | 0.337 | 0.336 | 0.604 | 0.475 | 0.708 |
| 23   | 2.190  | 1.395 | 2.317  | 1.153  | 2.321 | 1.585  | 2.334 | 1.040 | 2.072 | 2.059 | 1.768 | 1.566 | 1.340 | 2.649 | 2.287 |
| 24   | 0.472  | 0.348 | 0.456  | 0.296  | 0.149 | 0.469  | 0.213 | 0.198 | 0.318 | 0.303 | 0.483 | 0.142 | 0.539 | 0.416 | 0.460 |
| 25   | 0.171  | 0.196 | 0.264  | 0.541  | 0.301 | 0.322  | 0.162 | 0.143 | 0.228 | 0.209 | 0.199 | 0.141 | 0.285 | 0.238 | 0.225 |
| 26   | 0.912  | 1.043 | 1.983  | 0.454  | 0.842 | 0.818  | 0.524 | 0.833 | 1.045 | 0.996 | 0.617 | 0.384 | 1.411 | 1.255 | 1.424 |
| 27   | 0.879  | 0.830 | 0.831  | 1.194  | 1.426 | 2.119  | 1.381 | 1.169 | 1.711 | 1.683 | 0.852 | 1.014 | 1.044 | 0.883 | 1.227 |
| 28   | 0.395  | 0.399 | 0.425  | 0.337  | 0.455 | 0.255  | 0.444 | 0.203 | 0.487 | 0.426 | 0.254 | 0.329 | 0.505 | 0.407 | 0.572 |
| 29   | 5.665  | 7.599 | 10.665 | 13.252 | 6.085 | 18.767 | 7.068 | 7.492 | 9.541 | 7.824 | 4.026 | 5.327 | 6.020 | 4.753 | 8.704 |
| 30   | 0.962  | 1.230 | 2.051  | 2.411  | 1.127 | 0.379  | 1.323 | 1.277 | 1.543 | 1.353 | 0.726 | 0.992 | 1.102 | 0.849 | 1.546 |

9 **Table S2** Inhibition rates of 31 batches of Fuzi-Gancao extract on HeLa cells proliferation ( $\bar{x} \pm s$ , n=3)

| Sample | Inhibition rate/% | Sample | Inhibition rate/% | Sample | Inhibition rate/% |
|--------|-------------------|--------|-------------------|--------|-------------------|
| 1      | 88.71± 0.18       | 12     | 91.90±0.13        | 23     | 91.18±0.19        |
| 2      | 90.49±0.12        | 13     | 92.74±0.15        | 24     | 89.76±0.27        |
| 3      | 89.48±0.15        | 14     | 88.46±0.23        | 25     | 90.82±0.49        |
| 4      | 91.64± 0.09       | 15     | 91.72±0.21        | 26     | 89.70±0.46        |
| 5      | 87.27± 0.14       | 16     | 90.74±0.24        | 27     | 87.21±0.36        |
| 6      | 93.21±0.36        | 17     | 88.67±0.19        | 28     | 89.37±0.22        |
| 7      | 88.48±0.20        | 18     | 84.86±0.00        | 29     | 84.38±0.33        |
| 8      | 29.50±0.79        | 19     | 87.47±0.14        | 30     | 88.59±0.25        |
| 9      | 90.44±0.15        | 20     | 89.13±0.05        | 31     | 88.99±0.55        |
| 10     | 90.92±0.10        | 21     | 91.72±0.25        |        |                   |
| 11     | 90.44±0.27        | 22     | 92.06±0.30        |        |                   |

11 **Fig.S1** Structural formulas of compounds corresponding to the chromatographic peaks in HPLC-  
12 UV fingerprint of Fuzi- Gancao extract

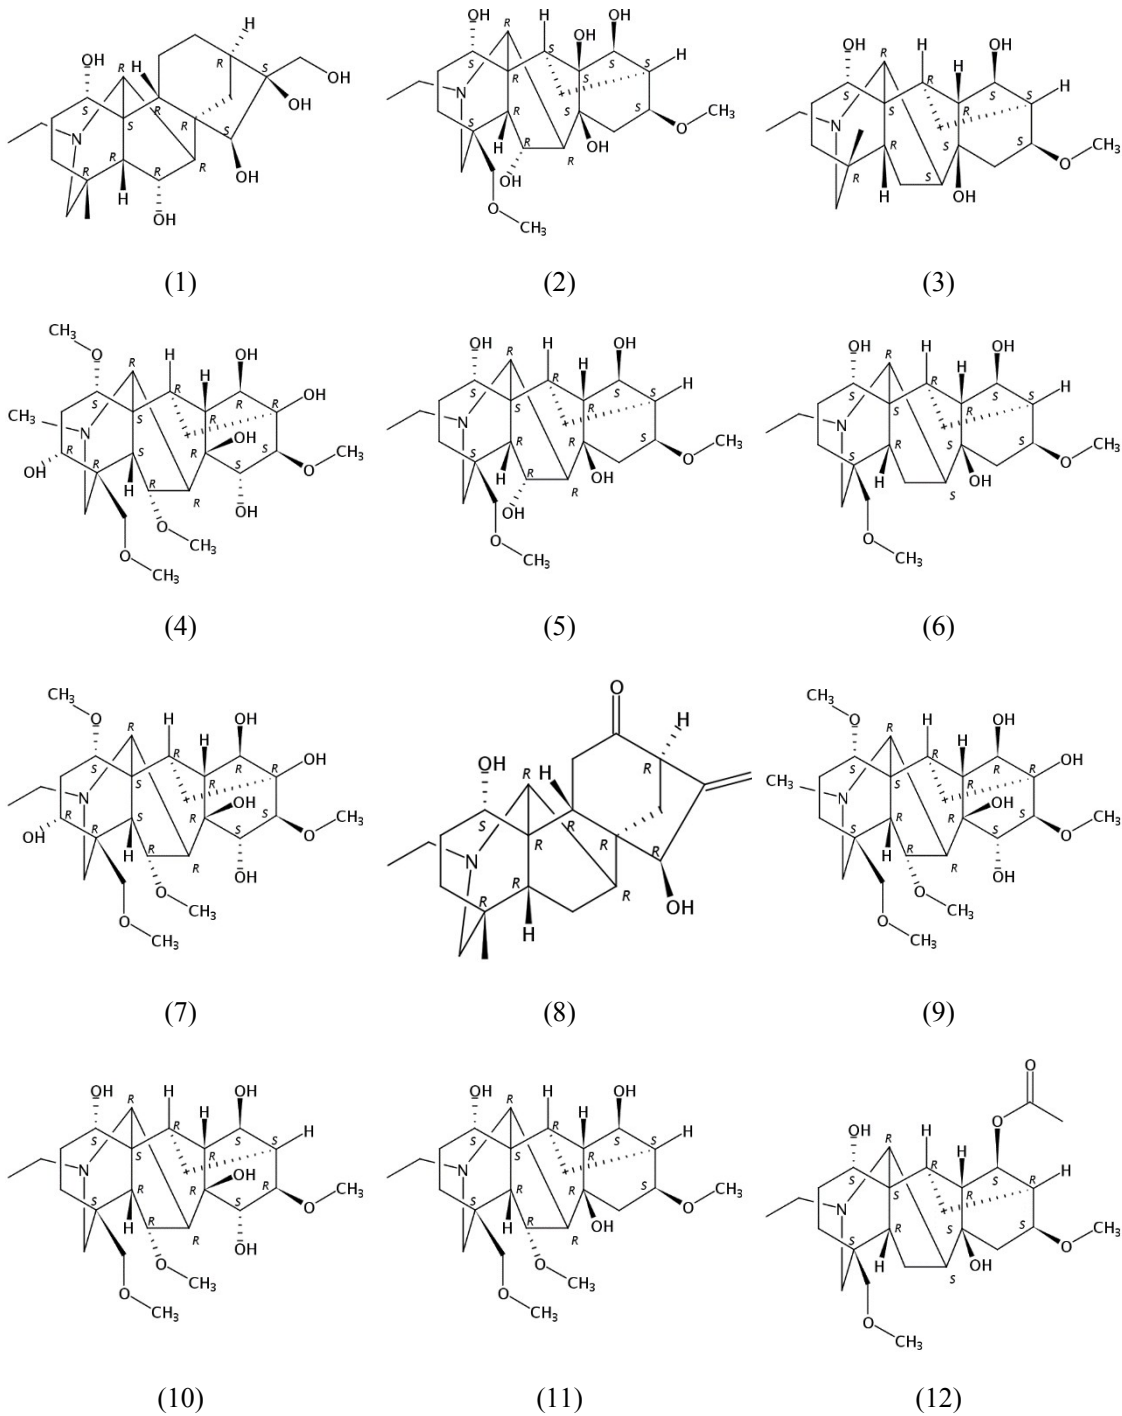

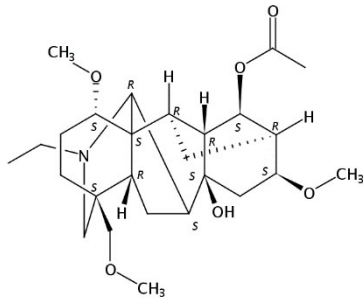

(13)

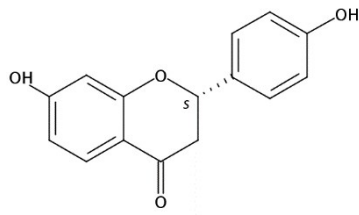

(14)

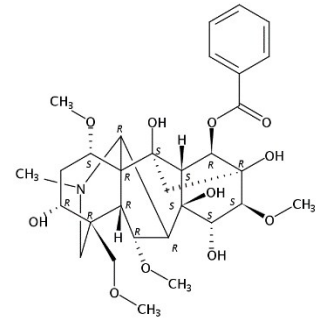

(15)

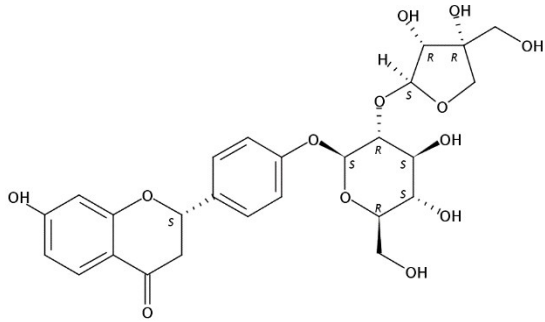

(16)

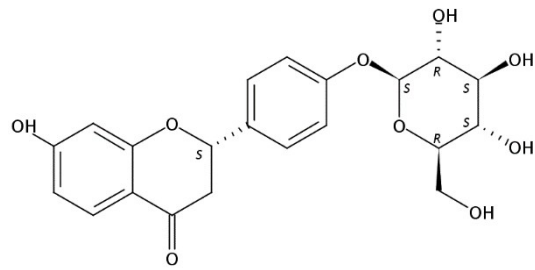

(17)

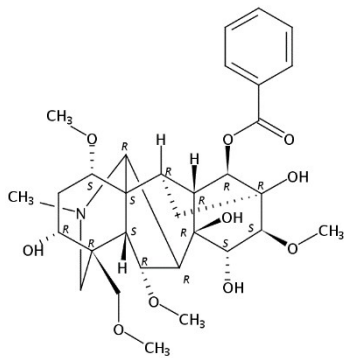

(18)

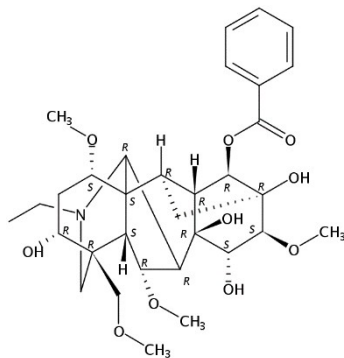

(19)

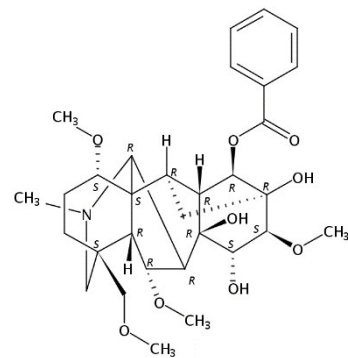

(22)

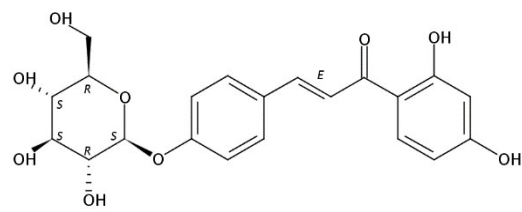

(21)

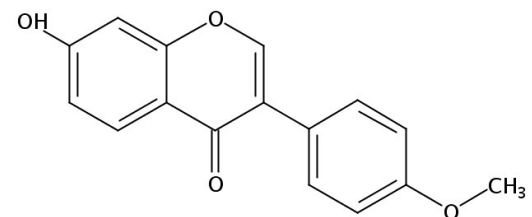

(23)

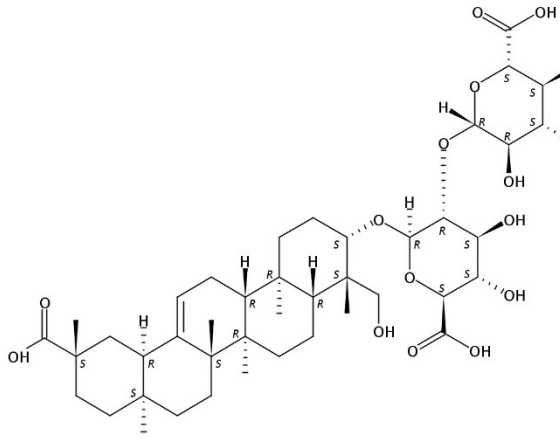

(24)

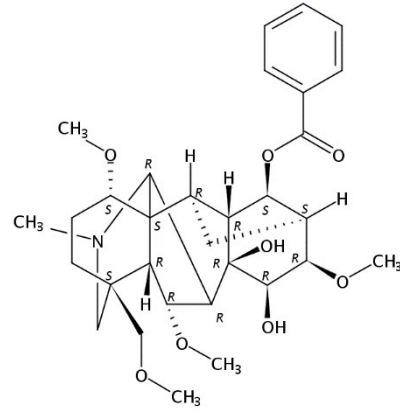

(25)

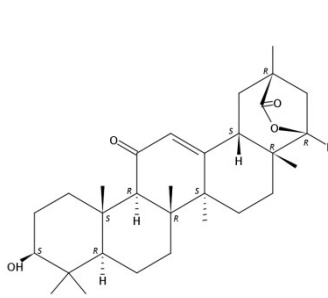

(26)

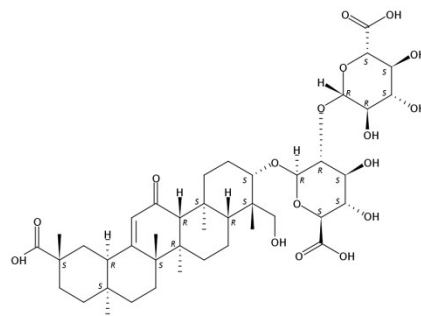

(27)

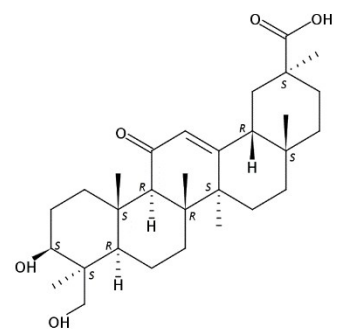

(28)

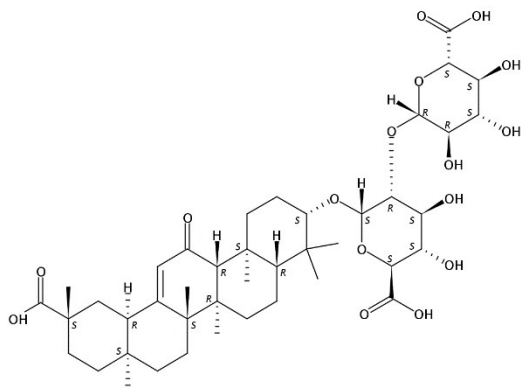

(29)

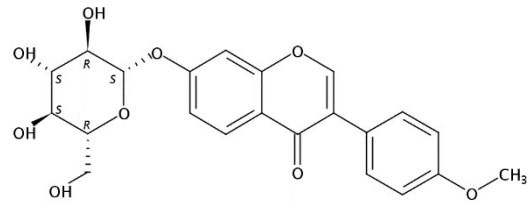

(30)
